# Supplementary material for: A rotaxane synthesis based on stilbene photoisomerization. A photoswitchable catch and release processElectronic supplementary information (ESI) available: NMR spectra. See http://www.rsc.org/suppdata/cc/b3/b306349f/
Source: Royal Society of Chemistry journal article supplement (doi:10.1039/b306349f), 2003-01-01
Supplement: esifile2.pdf [file esifile2.pdf]

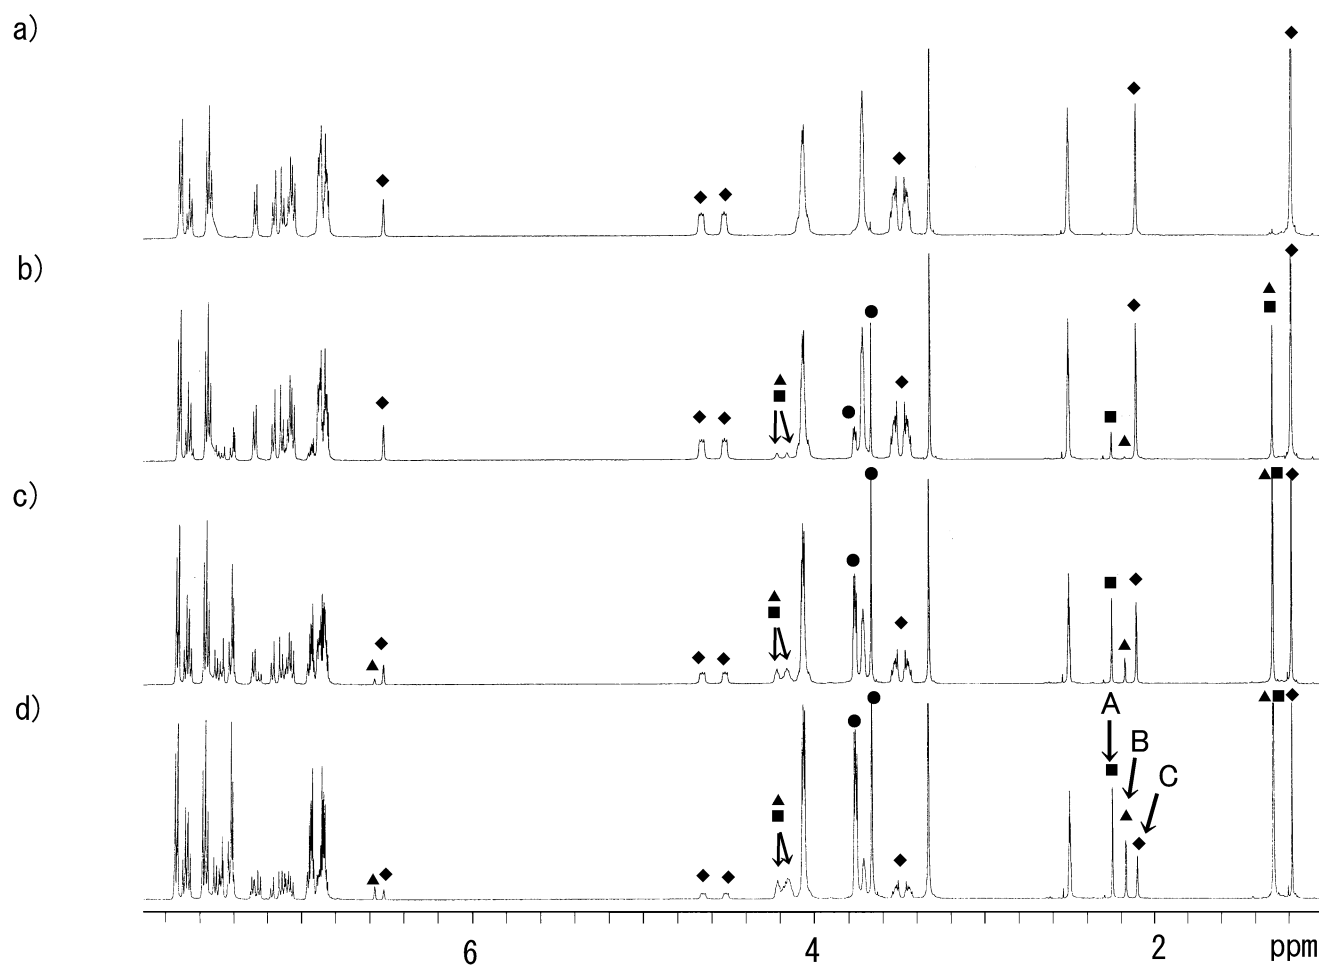

Figure

$^1\text{H}$  NMR spectra (500MHz,  $\text{d}_6\text{-DMSO}$ ) of a solution containing equimolar (16 mM) quantities of (*Z*)-4 and benzophenone, illustrating the dissociation of rotaxane (*Z*)-4. The spectra portrayed were recorded after (a) 0 min, (b) 12 min, (c) 60 min and (d) 120 min UV irradiation, respectively. The concentrations of three species were determined by the integrations of signals, A-C.

◆: (*Z*)-4, ■: (*E*)-3, ▲: (*Z*)-3, ●: DB24C8
